# Supplementary material for: Complexation of trivalent lanthanides and actinides with several novel diglycolamide-functionalized calix[4]arenes: solvent extraction, luminescence and theoretical studies
Source: Royal Society of Chemistry journal article supplement (doi:10.1039/c3ra40241j), 2013-01-01
Supplement: c3ra40241j.pdf [file c3ra40241j.pdf]

## **ELECTRONIC SUPPLEMENTARY MATERIAL**

**Complexation of trivalent lanthanides and actinides with several novel diglycolamide-functionalized calix[4]arenes: Solvent extraction, luminescence and theoretical studies**

Dhaval R. Raut,<sup>a</sup> Prasanta K. Mohapatra,<sup>a,\*</sup> Seraj A. Ansari,<sup>a</sup> Shrikant V. Godbole,<sup>a</sup> Mudassir Iqbal,<sup>b</sup> Debashree Manna,<sup>c</sup> Tapan K. Ghanty,<sup>c</sup> Jurrian Huskens<sup>b</sup> and Willem Verboom<sup>b</sup>

### Solvent extraction studies

**Fig. S-1:** Dependence of Am(III) extraction with C4DGA ( $L_1$ ) concentration (a) NPOE; (b) Hexone; (c) Nitrobenzene; (d) Chloroform; (e) n-dodecane.

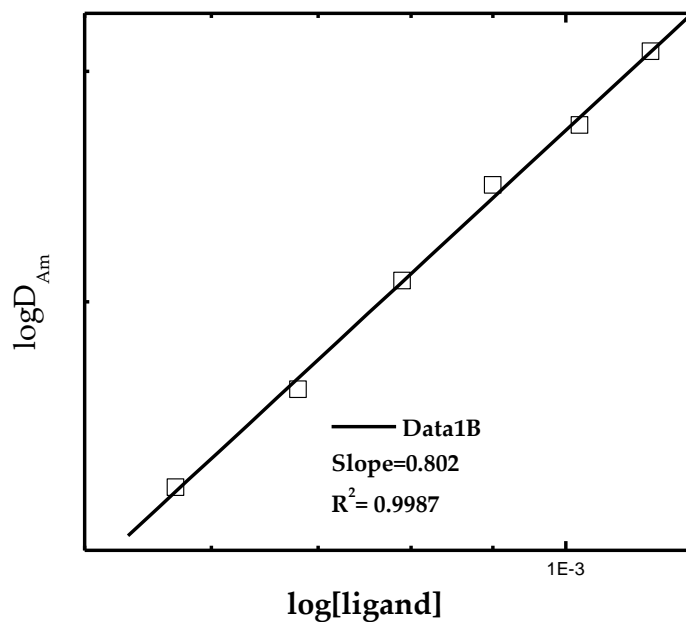

(a)

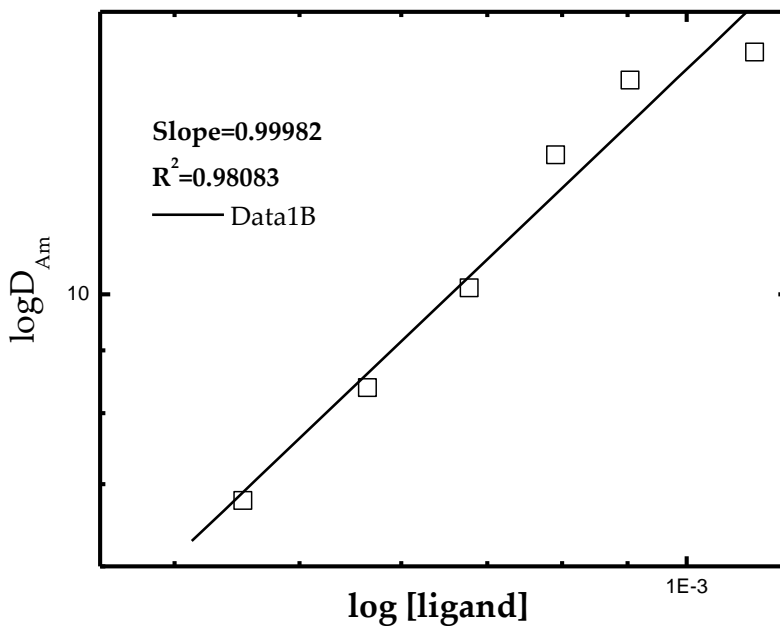

(b)

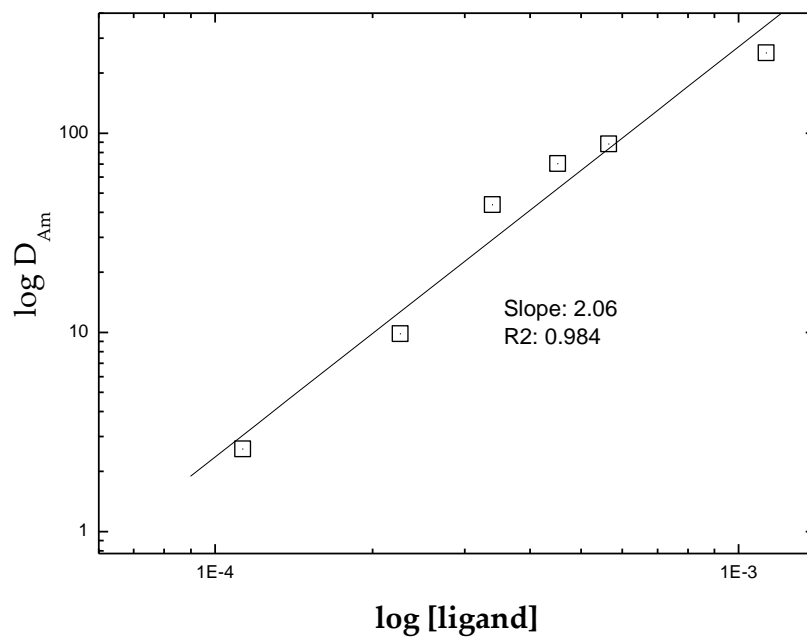

(c)

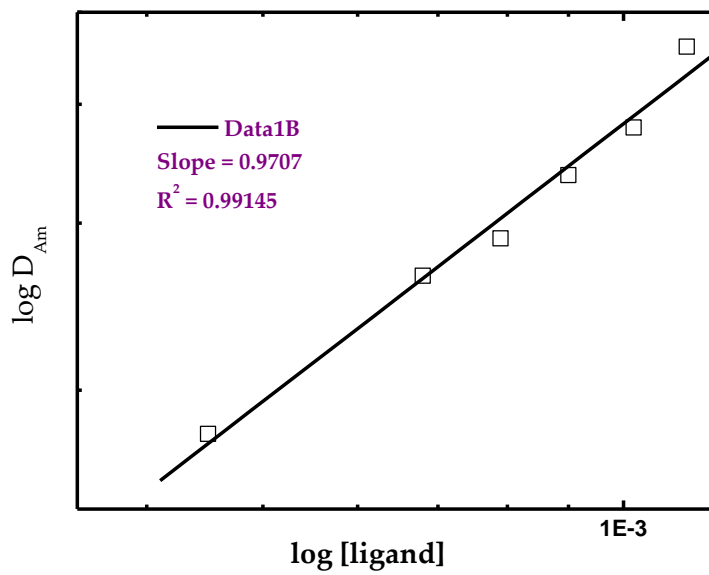

(d)

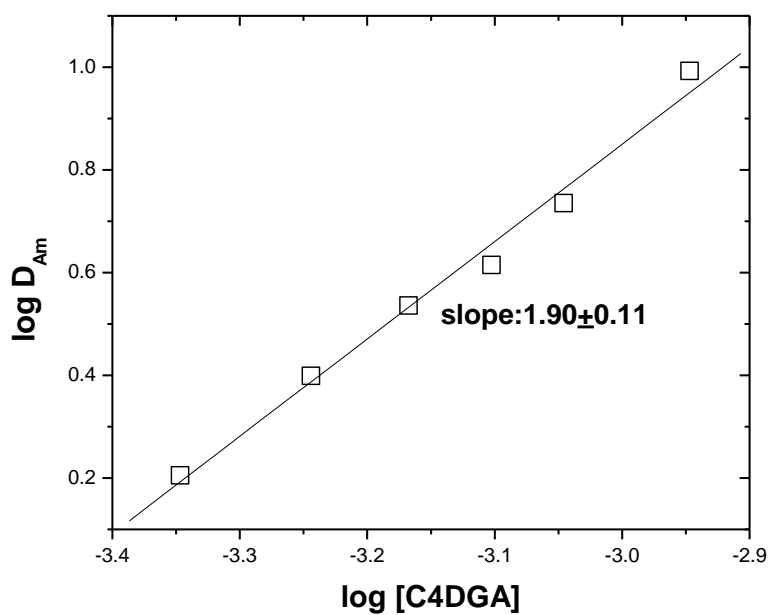

(e)

Fig. S-2: Dependence of  $D_{Am}$  and  $D_{Eu}$  on dielectric constant

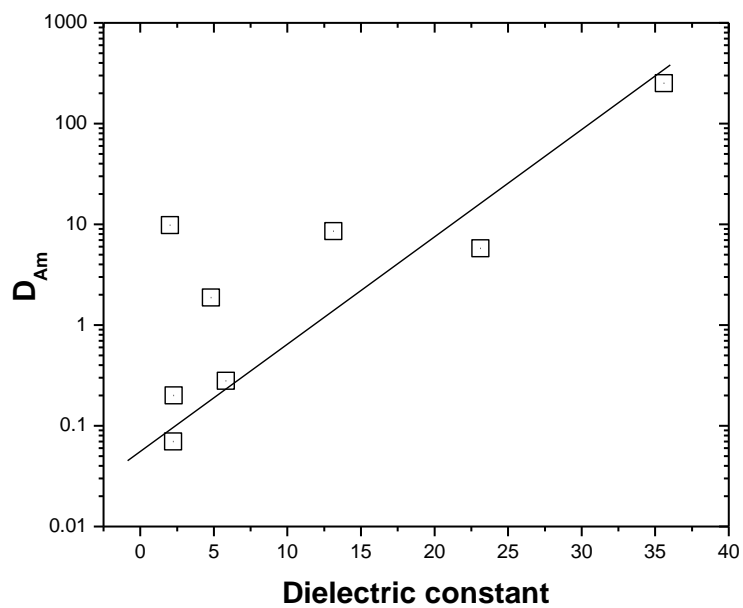

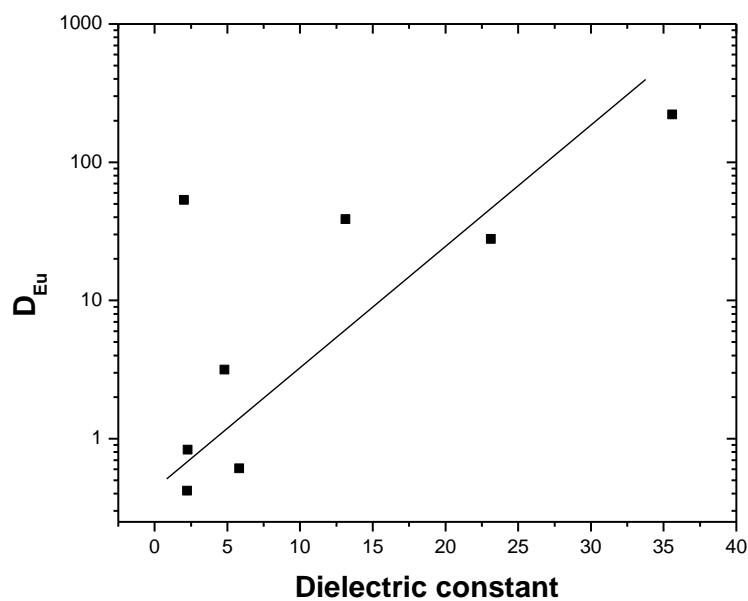

### Fluorescence spectroscopy studies

**Table S-1:** Different luminescence spectral peaks for  $\text{Eu}^{3+}$  ions.  $[\text{Eu}^{3+}]$ :  $10^{-5}$  mol/L; Diluent: Ethanol / water (5:1) in aqueous nitrate medium at pH 3; Excitation wavelength: 535 nm

| Peaks (nm) | Transition                                  | Life time ( $\mu\text{s}$ ) |
|------------|---------------------------------------------|-----------------------------|
| 591        | ${}^5\text{D}_0 \rightarrow {}^7\text{F}_1$ | 143                         |
| 617        | ${}^5\text{D}_0 \rightarrow {}^7\text{F}_2$ | 158                         |
| 692        | ${}^5\text{D}_0 \rightarrow {}^7\text{F}_4$ | 147                         |

**Table S-2: Peak intensity ratio of  $^5D_0 \rightarrow ^7F_2$  and  $^5D_0 \rightarrow ^7F_1$  transition in luminescence spectra of  $\text{Eu}^{3+}$  solution containing  $10^{-5}$  mol/L  $\text{Eu}(\text{NO}_3)_3$  and increasing amount of ligand. Diluent: Ethanol / water (5:1) in aqueous nitrate medium at pH 3; Excitation wavelength: 535 nm.**

| [Ligand] / [Metal] | $I_{617} / I_{591}$ |
|--------------------|---------------------|
| 0.0                | 1.02                |
| 0.05               | 1.21                |
| 0.10               | 1.40                |
| 0.20               | 1.45                |
| 0.30               | 1.61                |
| 0.40               | 1.62                |
| 0.60               | 1.49                |
| 0.80               | 1.59                |
| 1.0                | 1.64                |
| 1.5                | 1.70                |
| 2.0                | 1.65                |
| 5.0                | 1.66                |
